# Supplementary material
Source: ML conference proceedings conference paper supplement (https://openreview.net/forum?id=l0Ydsl10ci)
Supplement: supplementary_material [file attachment]

## A Appendix

### A.1 Additional Details on Our Dataset

**Number of words in a title.** Design patents typically contain limited textual information. One of the fields is the title, which describes the object the design patent protects. Figure 5 shows the number of words in each title over the years. It is noteworthy that the titles average only about 3 to 3.5 words, indicating a trend towards concise and specific naming conventions in design patent filings.

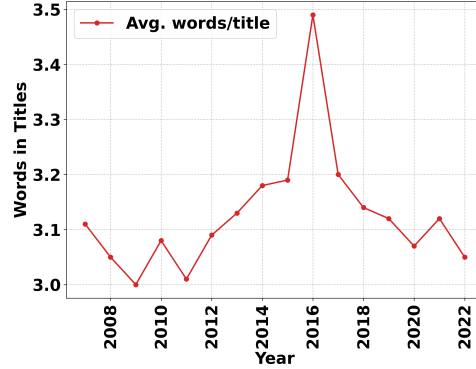

**Figure 5:** The distribution of the number of words in the title of the design patents over the years. This shows that the average number of words in the title of each patent is between 3 and 3.5.

**Frequent objects.** Figure 6 displays the top 10 objects that occur the most frequently in the data set. Display screens are the most common, with a frequency of 13,810, followed by shoes and bottles with frequencies of 4,327 and 3,718, respectively. Other frequently appearing objects include containers, mobile phones, chairs, tires, shoe uppers, electric devices, and faucets.

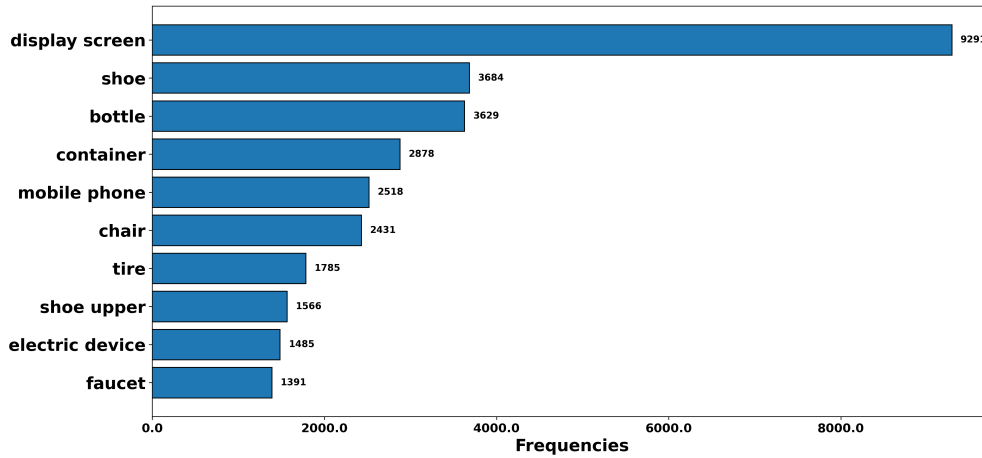

**Figure 6:** Distribution of the top 10 objects in the dataset by frequency. Display screens, including different types such as graphical user interfaces, animated graphical user interfaces, and transitional graphical user interfaces, are the most common objects in the dataset.

**Example of the fields.** In the constructed CSV files, we have 11 fields for each design patent. Table 5 shows the descriptions of the 11 fields extracted from the XML files with an example. The description defines the meaning of each column, and the examples of the fields are provided for the patent ID D0908314.

Table 5: Description of fields in the CSV file. There are 11 fields extracted from the XML files for each design patent. The description defines the meaning of each column, and the examples of the fields are provided for the patent ID D0908314.

| Column       | Description                                                                                                                                                                                        | Example                                                                                                                                                                                                                                                                                                          |
|--------------|----------------------------------------------------------------------------------------------------------------------------------------------------------------------------------------------------|------------------------------------------------------------------------------------------------------------------------------------------------------------------------------------------------------------------------------------------------------------------------------------------------------------------|
| title        | The title of the design is the name commonly recognized and used by the public                                                                                                                     | Garment with a side pocket                                                                                                                                                                                                                                                                                       |
| id           | Document number of the patent starts with a 'D' followed by a series of numbers, which uniquely identifies the patent.                                                                             | D0908314                                                                                                                                                                                                                                                                                                         |
| claim        | A design patent application includes only a single claim that defines the design the applicant wishes to patent, specifying the article in which the design is embodied or to which it is applied. | The ornamental design for a garment with a side pocket, as shown and described.                                                                                                                                                                                                                                  |
| date         | Publication date of the patent                                                                                                                                                                     | 20210126                                                                                                                                                                                                                                                                                                         |
| class        | U.S. design patent category under which the patent is classified                                                                                                                                   | D2728, D2840                                                                                                                                                                                                                                                                                                     |
| class_search | U.S. classification codes aiding in determining its scope and relevant prior art                                                                                                                   | ['0202', 'D2728', 'D2839', 'D2829', 'D2750', 'D2839', 'D 2750', 'D2857', 'D2840', 'D2829', 'D 2840', 'D2840', 'D2840', 'D2829', 'D 2839', 'D2840', 'D21804', '293', '224153', 'D2712', 'D2720', 'D2750', 'D2831', 'D2853', 'D2865', 'D2873', 'D2874', 'D2878', 'D2840', 'D2839', 'D2857', 'D2728', 'D21801-805'] |
| inv_country  | Country of the inventors                                                                                                                                                                           | US                                                                                                                                                                                                                                                                                                               |
| no_figs      | Number of figures for the design                                                                                                                                                                   | 7                                                                                                                                                                                                                                                                                                                |
| sheets       | Number of design sheets provided for the figures. Some of the sheets has multiple figure views                                                                                                     | 4                                                                                                                                                                                                                                                                                                                |
| file_names   | The filenames that contain the images of the particular design.                                                                                                                                    | ['USD0908314-20210126-D00000.TIF', 'USD0908314-20210126-D00001.TIF', 'USD0908314-20210126-D00002.TIF', 'USD0908314-20210126-D00003.TIF', 'USD0908314-20210126-D00004.TIF']                                                                                                                                       |
| fig_desc     | The Figure Descriptions specify the representation of each drawing view, such as front view, top view, perspective, and others                                                                     | ['FIG. 1 is a front left perspective view of the garment with a side pocket, showing my new design', 'FIG. 2 is a front view', 'FIG. 3 is a rear view', 'FIG. 4 is a left side view', 'FIG. 5 is a right side view', 'FIG. 6 is a top view thereof', 'FIG. 7 is a bottom view']                                  |
| caption      | Elaborated captions for the design which includes shape and functionality                                                                                                                          | The image is a square-shaped illustration of a garment with a side pocket. The functionality of the image is to showcase the design and features of the garment, such as the pocket, which can be useful for potential customers or designers to visualize the product and its details.                          |

**Frequent USPC class.** Table 6 lists the top 10 most frequent class-subclass occurrences in the dataset. The most common class-subclass is D14-486, "Recording, Communication, or Information Retrieval Equipment," with 7,618 occurrences, specifically describing drop-down or full-screen menu types. Other notable entries include D14-485, D26-28, and D12-209, covering generated images, vehicle lamps or casings, and transportation apertures, respectively.

Table 6: Overview of the 10 Class-Subclass Occurrences. This lists the frequency of occurrences for each class-subclass, along with descriptions that specify the general category and particular functionalities or features characterized by each subclass. Note that some patents belong to multiple classes. For simplicity, we have counted only the primary class and that results in a single classification code for each patent.

| Class-Subclass | Occurrence | Class Description                                                   | Subclass Description                                                        |
|----------------|------------|---------------------------------------------------------------------|-----------------------------------------------------------------------------|
| D14-486        | 7359       | Recording, Communication, or Information Retrieval Equipment        | Drop down menu or full screen menu type                                     |
| D14-485        | 5363       | Recording, Communication, or Information Retrieval Equipment        | Generated image                                                             |
| D26-28         | 4149       | Lighting                                                            | Vehicle lamp or casing                                                      |
| D12-209        | 2700       | Transportation                                                      | Aperture or simulated aperture                                              |
| D2-972         | 2432       | Apparel and Haberdashery                                            | Vamp, toe, heel, or side panel                                              |
| D12-169        | 2399       | Transportation                                                      | Vehicle-attached front or rear type                                         |
| D14-250        | 2320       | Recording, Communication, or Information Retrieval Equipment        | Cover for base or handset                                                   |
| D13-147        | 2201       | Equipment for Production, Distribution, or Transformation of Energy | Linear array of identical repeating ports or contacts (i.e., in-line array) |
| D14-488        | 2022       | Recording, Communication, or Information Retrieval Equipment        | Visible shutter                                                             |
| D14-126        | 1998       | Recording, Communication, or Information Retrieval Equipment        | Receiver or monitor                                                         |

**Example viewpoints.** We provide examples of the drawings that are available in the design patents. Figure 7 shows four viewpoints of a design object titled as *ceiling fan*. 7a and 7b represent top and bottom perspectives respectively, whereas 7c and 7d are top and bottom view, respectively.

## A.2 Generated Captions Examples and Comparisons

For caption generation, we use LLaVA, GPT-4o, and Qwen-VL. Qwen-VL often lacks functional descriptions and occasionally includes Chinese words within English captions. Although GPT-4o provides high-quality captions, it comes with a higher cost. Figure 8 illustrates an example of a design patent along with the captions generated by each model.

## A.3 US Design Patent Classification

The subject matter of U.S. design patents is categorized into 33 distinct classes<sup>9</sup>. Unlike utility patents, design patents are organized by classes and subclasses only. Table 7 lists all the categories of the design patents.

## A.4 PatentCLIP

We also provide a PatentCLIP which is finetuned from OpenAI’s CLIP pre-trained models with IMPACT dataset. In this section, we illustrate the implementation details and qualitative analysis using the learned feature embedding space from IMPACT.

<sup>9</sup><https://www.uspto.gov/patents/laws/examination-policy/seven-classification-design-patents>

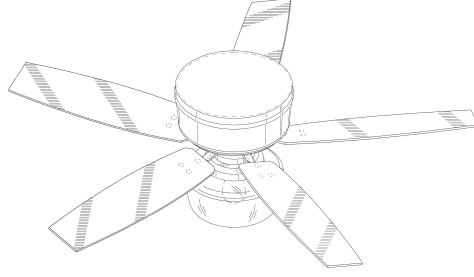

FIG. 1

(a) Top perspective

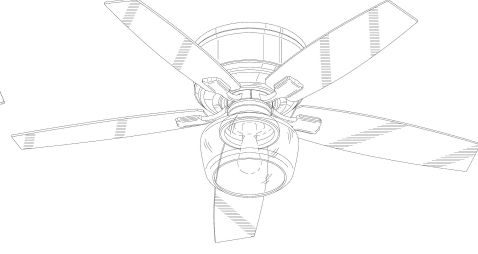

FIG. 2

(b) Bottom perspective

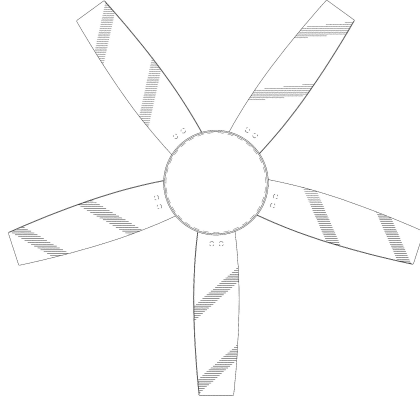

FIG. 3

(c) Top view

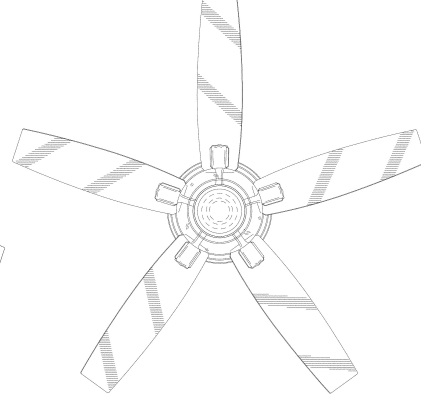

FIG. 4

(d) Bottom view

Figure 7: An example of image perspectives and viewpoints in a design patent. The patent is about the design of a ceiling fan.

#### A.4.1 Implementation details

We use an open source implementation of CLIP<sup>10</sup>. The models are ResNet50, ResNet101, ViT-B-32 and ViT-L-14. The hyperparameters for finetuning is listed as follows: learning rate is  $5e - 6$ , weight decay is 0.1, and optimizer is AdamW for all models. The batch size is 256 except 64 for ViT-L-14. All settings are same to image-title and image-caption pairs. All finetuning and inference are conducted on 4 NVIDIA V100 GPUs.

#### A.4.2 Qualitative analysis

To analysis the effective of finetuning CLIP on IMPACT dataset, we visualize the learned image features and text features for sample patents using U-MAP projection [37]. The sample patents are selected from the top 4 subclass in the recent five years data, including D12-209, D14-485, D14-486 and D26-28. In total, there are 5,699 patents. All the model backbone is ViT-B-32. For text features, we visualize the embeddings for the captions.

Feature embedding spaces of multiple modalities on sample IMPACT dataset are shown in Fig 9. Different colors representing the clusters of the corresponding classes. We observe that PatentCLIP can identify clusters over the extracted image features better than CLIP, see 9a, 9c and 9e. Comparing with PatentCLIP-title, PatentCLIP have the better clustering performance on the extracted text features, it can identify D14 is far to D12. Note that, CLIP also can identify text feature clusters because that the captions are generated with VLMs. However, CLIP is not able to classify the patent images. Indeed, we can see that different classes cluster clearly, and similar subclasses are often close in the embedding spaces, such as D14-485 and D14-486 (see class description in Tab 6). Therefore,

<sup>10</sup>[https://github.com/mlfoundations/open\\_clip](https://github.com/mlfoundations/open_clip)



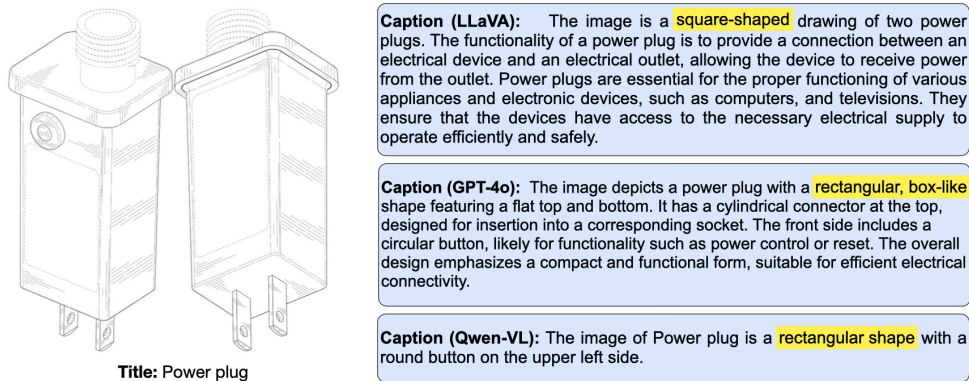

**Figure 8:** Captions generated by LLaVA, GPT-4o, and Qwen-VL of a power plug design. The shapes are highlighted in yellow.

we believe that finetuning VLMs with IMPACT is beneficial in the specific patent domain for many downstream tasks, such as classification and retrieval.

## A.5 Multimodal Retrieval

### A.5.1 Additional results

We provide additional results on the performance of finetuned PatentCLIP-title on Text-Image and Image-Text retrievals. All the training hyper-parameters are same as the PatentCLIP model (see Sec A.4). The dataset used here is the image and title pairs in IMPACT. As results shown in Table 8, the performance pattern is similar to PatentCLIP, which is that the more advanced models and the models with more parameters perform better. Comparing the results of PatentCLIP which is finetuned on image and caption pairs in Table 3 is similar except for R@1 results of ResNet family. Others R@K results of finetuning image-captions are significantly improved than PatentCLIP-title.

### A.5.2 Qualitative analysis

To further analyze the multimodal retrieval results, we demonstrate three Text-image retrieval examples as follows.

- Example 1: *Text Query:* The image is a square-shaped drawing of a protective case for a game controller. *Ground truth image:* D1006114.TIF
- Example 2: *Text Query:* The image is a black and white drawing of a computer mouse, which is a device used for controlling and interacting with a computer. *Ground truth image:* D0943581.TIF
- Example 3: *Text Query:* The image is a white drawing of an FM transmitter, which is a device used to transmit audio signals through the air using frequency modulation (FM) technology. *Ground truth image:* D0985524.TIF

Figure 10 shows that PatentCLIP-title and PatentCLIP are able to retrieval game controller, but CLIP only can recall the items with square-shaped. All top 5 retrieved images of PatentCLIP are related with game controller, and the top 1 result is correct. As results shown in Fig 11, both CLIP and PatentCLIP obtained the correct images in top 5 set, but PatentCLIP produce the top 1 image correctly. Other four images and the images obtained from PatentCLIP-title are not relevant with the text query. In Figure 12, only PatentCLIP retrieve the top 1 image correctly. We see that the retrieved images by our PatentCLIP model are relevant to the text queries not only in the shape but also in terms of the function. Thus, we conclude that captions provide more information for VLMs to learn the patents. Our PatentCLIP model is also helpful for the prior art search and the design inspiration.

## A.6 3D construction Examples

We provide two more detailed 3D constructions examples in Fig. 13. We utilize ControlNet [58] to generate 3D photos for patent images. Comparing the results of prompting with IMPACT captions

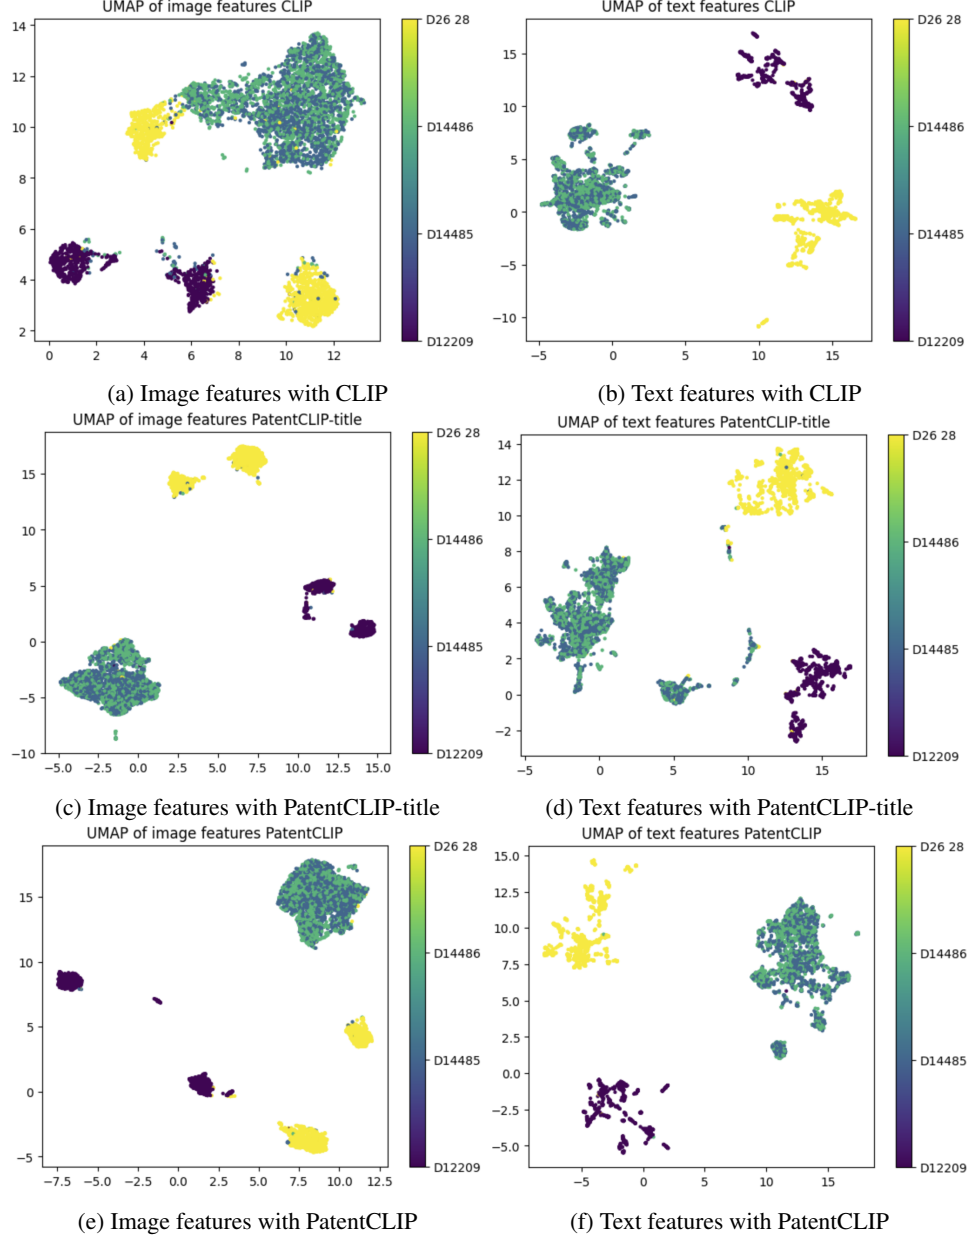

Figure 9: UMAP feature embeddings for sample patent images. (a) Visualization using CLIP models (b) Visualization using PatentCLIP finetuned on title (c) Visualization using PatentCLIP finetuned on caption. PatentCLIP shows well formed clusters in both image and text-based features.

Table 7: The table shows the list of U.S. design patent classes.

| Class | Description                                                              |
|-------|--------------------------------------------------------------------------|
| D1    | Edible Products                                                          |
| D2    | Apparel and Haberdashery                                                 |
| D3    | Travel Goods, Personal Belongings, and Storage or Carrying Articles      |
| D4    | Brushware                                                                |
| D5    | Textile or Paper Yard Goods; Sheet Material                              |
| D6    | Furnishings                                                              |
| D7    | Equipment for Preparing or Serving Food or Drink Not Elsewhere Specified |
| D8    | Tools and Hardware                                                       |
| D9    | Packages and Containers for Goods                                        |
| D10   | Measuring, Testing or Signaling Instruments                              |
| D11   | Jewelry, Symbolic Insignia, and Ornaments                                |
| D12   | Transportation                                                           |
| D13   | Equipment for Production, Distribution, or Transformation of Energy      |
| D14   | Recording, Communication, or Information Retrieval Equipment             |
| D15   | Machines Not Elsewhere Specified                                         |
| D16   | Photography and Optical Equipment                                        |
| D17   | Musical Instruments                                                      |
| D18   | Printing and Office Machinery                                            |
| D19   | Office Supplies; Artists' and Teachers' Materials                        |
| D20   | Sales and Advertising Equipment                                          |
| D21   | Games, Toys and Sports Goods                                             |
| D22   | Arms, Pyrotechnics, Hunting and Fishing Equipment                        |
| D23   | Environmental Heating and Cooling, Fluid Handling and Sanitary Equipment |
| D24   | Medical and Laboratory Equipment                                         |
| D25   | Building Units and Construction Elements                                 |
| D26   | Lighting                                                                 |
| D27   | Tobacco and Smokers' Supplies                                            |
| D28   | Cosmetic Products and Toilet Articles                                    |
| D29   | Equipment for Safety, Protection and Rescue                              |
| D30   | Animal Husbandry                                                         |
| D32   | Washing, Cleaning or Drying Machines                                     |
| D34   | Material or Article Handling Equipment                                   |
| D99   | Miscellaneous                                                            |

Table 8: Multimodal retrieval tasks in finetuned settings for image-text pairs used in the experiments. The best Recall@K (%) are shown in bold.

|           | Dataset     | Backbone  | Text-Image   |              |              | Image-Text   |              |              |
|-----------|-------------|-----------|--------------|--------------|--------------|--------------|--------------|--------------|
|           |             |           | R@1          | R@5          | R@10         | R@1          | R@5          | R@10         |
| Finetuned | Image-Title | ResNet50  | 5.44         | 14.98        | 21.54        | 5.18         | 14.46        | 20.28        |
|           |             | ResNet101 | 7.76         | 18.98        | 24.66        | 7.16         | 18.30        | 24.38        |
|           |             | ViT-B-32  | 9.16         | 22.38        | 29.20        | 8.42         | 22.18        | 28.86        |
|           |             | ViT-L-14  | <b>14.88</b> | <b>33.04</b> | <b>41.42</b> | <b>13.75</b> | <b>31.98</b> | <b>39.96</b> |

and prompting with patent title, we observe that our captions can provide more guidance for diffusion models.

## A.7 Visual Question Answering Examples

We provide two more detailed Visual question answering (VQA) examples. Based on IMPACT dataset, we design a set of questions which are relevant to design patents. Figures 14 and 15 are two examples with 3 questions and answers for each example patent images. We use LLaVa [35] to generate answers.

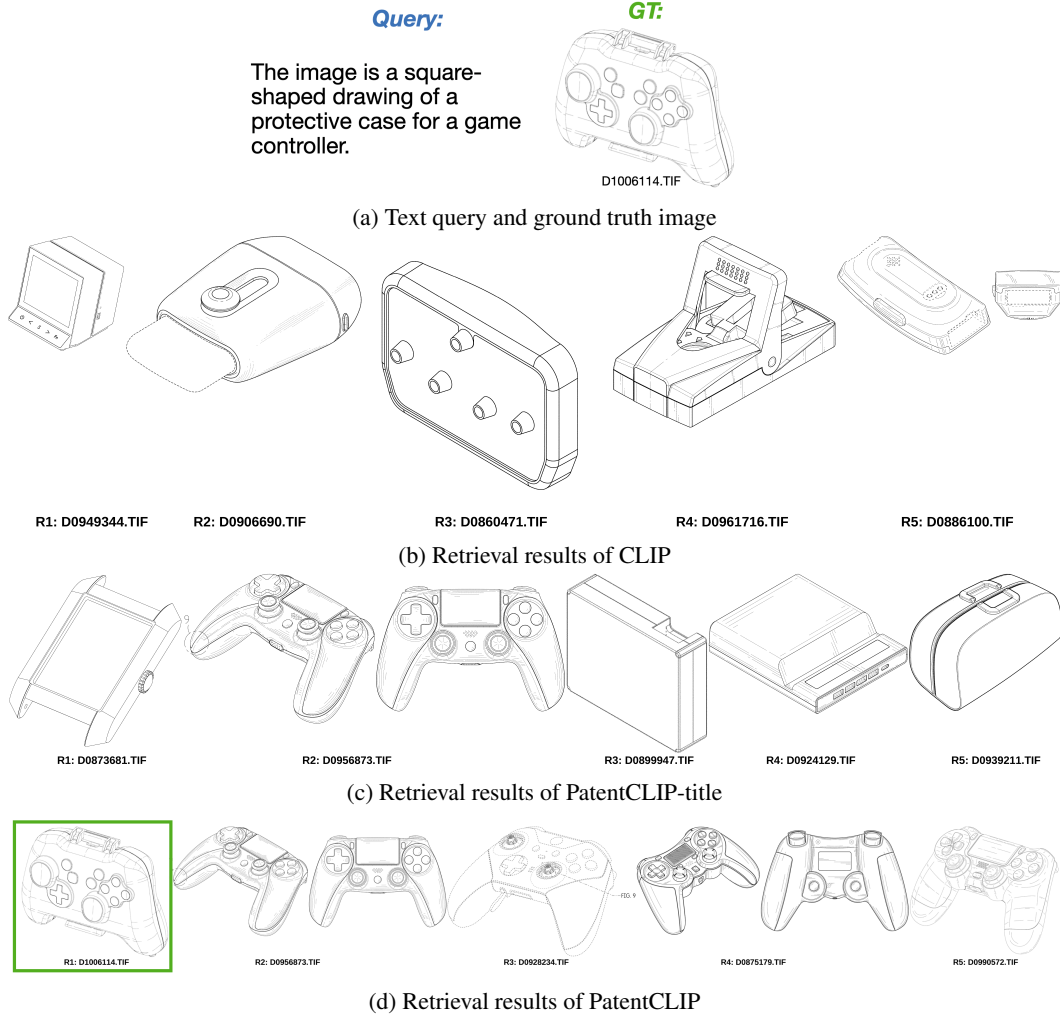

Figure 10: Text-image Retrieval example 1. Text query is shown in (a). (b), (c), and (d) are top 5 retrieval results of CLIP, PatentCLIP-title and PatentCLIP respectively. Top 1-5 is from left to right. Green box denotes to the correct image. In this case, only PatentCLIP retrieves correctly, which means PatentCLIP learned relevant multimodal features in the patent domain.

We can see that the answers are general text, but they are still helpful for further patent analyses. Thus, we propose a IMPACT-VQA to be a patent specific domain, which can provide more patent related information VQA systems and will be a good future direction to explore.

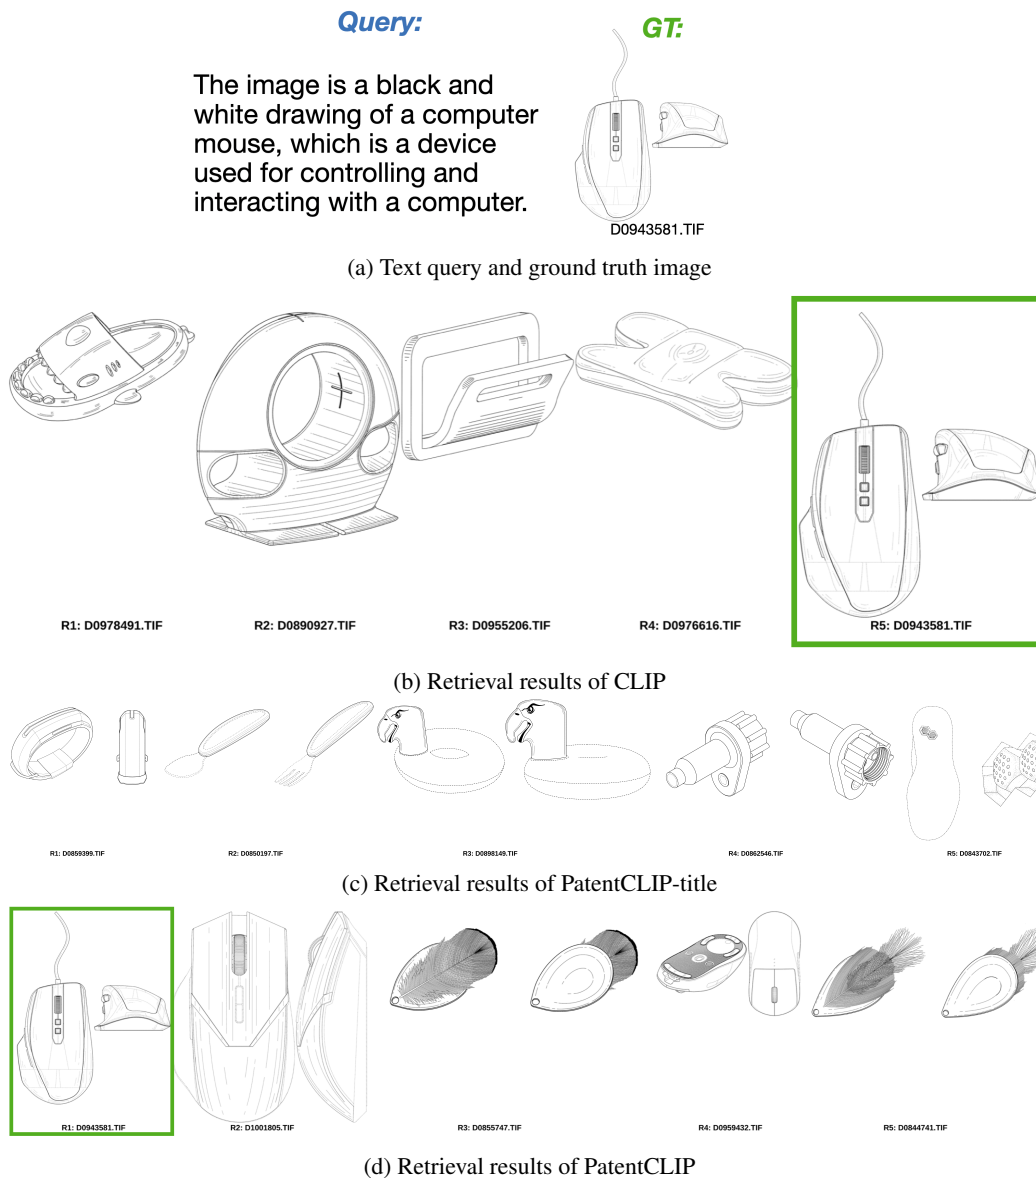

Figure 11: Text-image Retrieval example 2. Text query is shown in (a). (b), (c), and (d) are top 5 retrieval results of CLIP, PatentCLIP-title and PatentCLIP respectively. Top 1-5 is from left to right. Green box denotes to the correct image. In this case, only CLIP and PatentCLIP retrieves correctly.

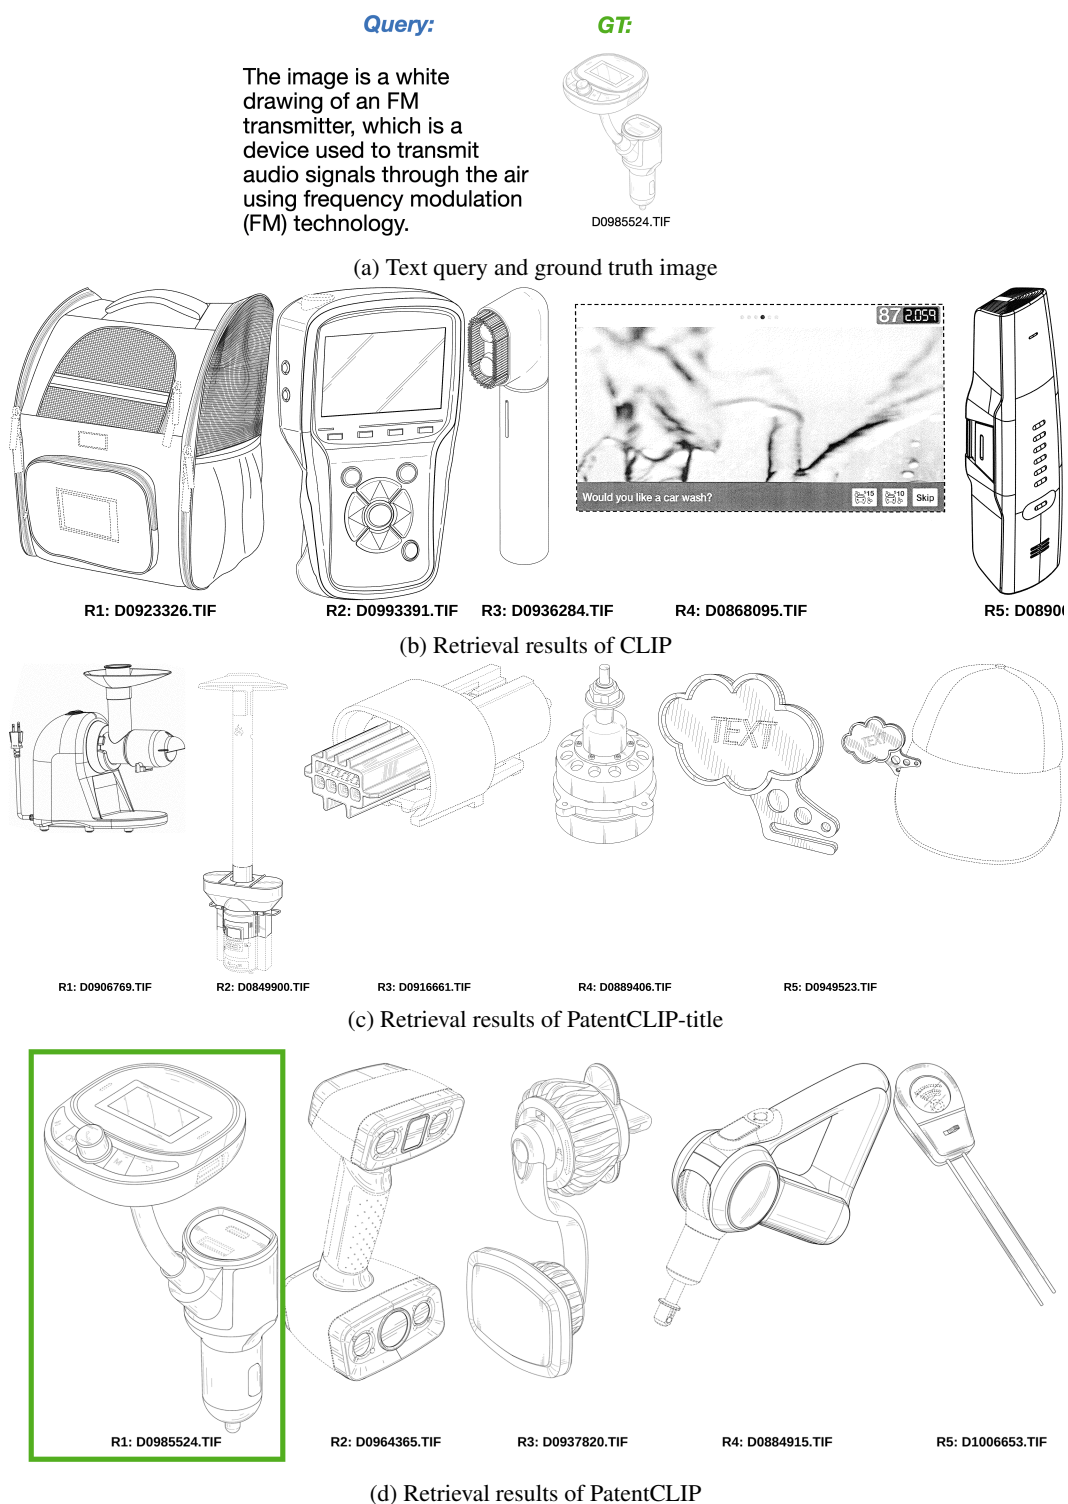

Figure 12: Text-image Retrieval example 3. Text query is shown in (a). (b), (c), and (d) are top 5 retrieval results of CLIP, PatentCLIP-title and PatentCLIP respectively. Top 1-5 is from left to right. Green box denotes to the correct image. In this case, only PatentCLIP retrieves correctly.



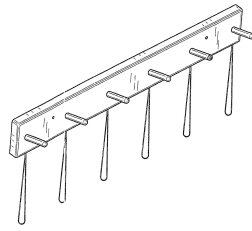

(a) Image

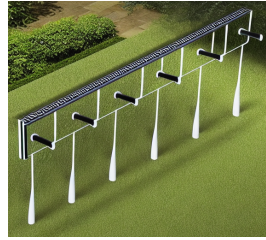

(b) Title

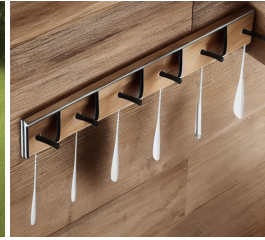

(c) Caption

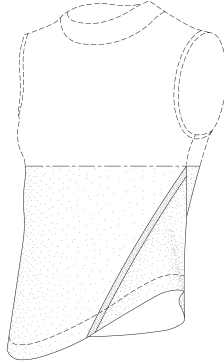

(d) Image

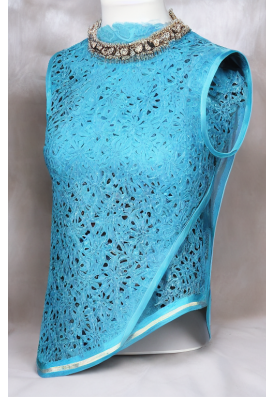

(e) Title

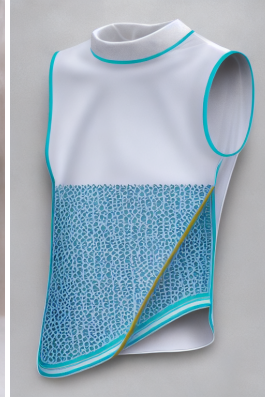

(f) Caption

Figure 13: Examples of 3D reconstruction. (a) and (d) are patent images. (b) and (e) are generated images with title as text prompt. (c) and (f) are generated images with IMPACT captions.

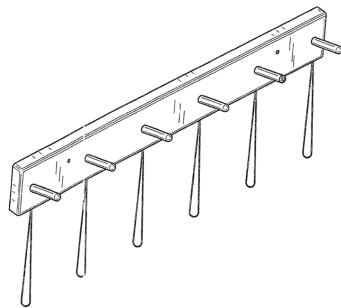

**Caption:** The image is a rectangle, and it features a wooden utility rack with several hooks. The functionality of the utility rack is to provide a convenient and organized storage solution for various items, such as tools, utensils, or small equipment. The hooks allow users to hang items on the rack, keeping them off the countertops and keeping the workspace tidy and clutter-free.

Q1: what is the funtion of this item?

The item in the image is a wooden rack with multiple hooks, which is designed to hold and organize various objects, such as tools, utensils, or other items. The hooks provide a convenient and space-saving way to store and display these items, making it easy to access and keep the area tidy. The wooden rack can be used in various settings, such as a workshop, kitchen, or garage, to keep items organized and within reach.

Q2: what is the novel idea of this wooden rack with multiple hooks?

The novel idea of a wooden rack with multiple hooks is that it provides an efficient and space-saving solution for organizing and storing various items. The hooks allow for easy access to the stored items and help keep the area tidy and clutter-free. This type of rack is particularly useful in settings where space is limited, such as workshops, kitchens, or garages, where it is essential to keep tools, utensils, or other items organized and within reach. The wooden construction of the rack also adds a touch of aesthetic appeal and can blend well with the surrounding environment.

Q3: any new design suggestions for this wooden rack with multiple hooks?

Based on the image of the wooden rack with multiple hooks, here are some additional design suggestions:

1. Adjustable Hooks: The hooks on the rack could be adjustable, allowing users to customize the spacing and height of the hooks to accommodate different items and preferences.
2. Additional Storage Options: The rack could be designed with additional storage options, such as shelves or drawers, to accommodate a wider range of items and provide more flexibility in organizing the space.
3. Material Variations: The rack could be made from different materials, such as metal or plastic, to offer a more durable or weather-resistant option.
4. Customizable Design: The rack could be designed with interchangeable hooks or shelves, allowing users to customize the rack according to their specific needs and preferences. Integrated Storage: The rack could be integrated into a larger storage system, such as a wall-mounted cabinet or a freestanding unit, to create a more cohesive and functional storage solution. Multi-Purpose Design: The rack could be designed to serve multiple purposes, such as a pot rack for hanging pots and pans or a wine rack for storing wine bottles, depending on the user's needs.

Figure 14: Detailed VQA example 1, given an patent image from IMPACT, we design a few questions and use LLaVA to generate answers.

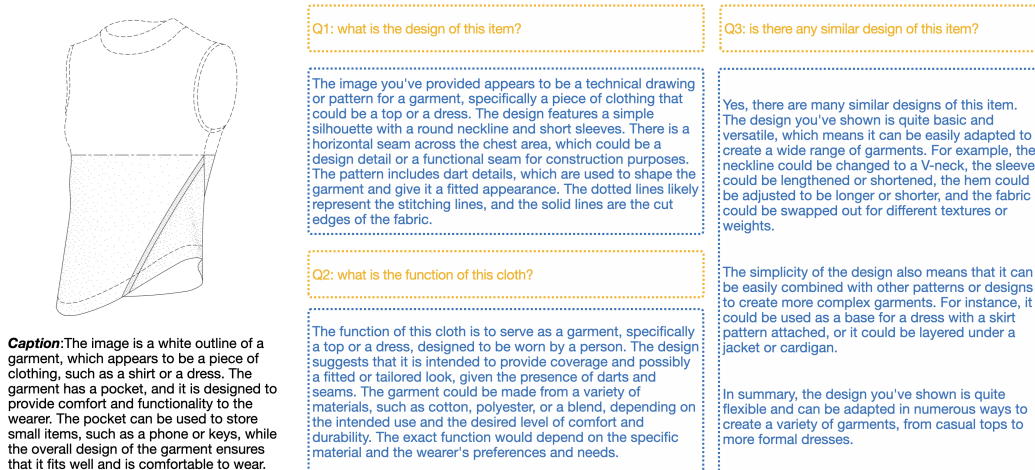

Figure 15: Detailed VQA example 1, given an patent image from IMPACT, we design a few questions and use LLaVA to generate answers.
